## **RAPID SEROLOGICAL TESTS HAVE A ROLE IN ASYMPTOMATIC HEALTH WORKERS COVID-19 SCREENING**

**Angelo Virgilio Paradiso<sup>1</sup>, Simona De Summa<sup>2</sup>, Nicola Silvestris<sup>3-4</sup>, Stefania Tommasi<sup>2</sup>, Antonio Tufaro<sup>5</sup>, Giuseppe De Palma<sup>5</sup>, Angela Maria Vittoria Larocca<sup>6</sup>, Maria Chironna<sup>6-9</sup>, Vincenzo D'Addabbo<sup>10</sup>, Donata Raffaele<sup>1</sup>, Vito Cafagna<sup>11</sup>, Vito Garrisi<sup>11</sup>**

1. Scientific Directorate, IRCCS-Istituto Tumori "Giovanni Paolo II", Via O.Flacco, 65-70124 Bari, Italy
2. Molecular Diagnostics and Pharmacogenetics Unit, IRCCS-Istituto Tumori "Giovanni Paolo II", Via O.Flacco, 65-70124 Bari, Italy
3. Department of Biomedical Sciences and Human Oncology, Unit of Internal Medicine "Guido Baccelli", University of Bari Medical School, 70124 Bari, Italy.
4. Medical Oncology Unit, IRCCS Istituto Tumori "Giovanni Paolo II" of Bari, Viale Orazio Flacco, 65, 70124 Bari, Italy
5. Institutional BioBank, Experimental Oncology and Biobank Management Unit, IRCCS Istituto Tumori "Giovanni Paolo II", Via O.Flacco, 65-70124 Bari, Italy
6. Hygiene Unit, Policlinico Hospital, Piazza G. Cesare 11, 70124 Bari, Italy
7. Department of Biomedical Sciences and Human Oncology-Hygiene Section, University of Bari, Piazza G. Cesare 11, 70124 Bari, Italy
8. Emergency Department, Policlinico Hospital, Piazza G. Cesare 11, 70124 Bari, Italy
9. Regional Epidemiological Observatory, Apulia Region, Bari, Italy
10. UO SSD Servizio Professioni Sanitarie, IRCCS-Istituto Tumori "Giovanni Paolo II", Via O.Flacco, 6570124 Bari, Italy
11. Clinical Pathology Laboratory, IRCCS-Istituto Tumori "Giovanni Paolo II", Via O.Flacco, 65-70124 Bari, Italy

**Address for correspondence:**

**Simona De Summa**

**Molecular Diagnostics and Pharmacogenetics Unit  
IRCCS-Istituto Tumori "Giovanni Paolo II"**

**email: [s.desumma@oncologico.bari.it](mailto:s.desumma@oncologico.bari.it)**

**mobile: +39-3465229098**

## **Abstract**

Health workers are at high risk for SARS-CoV-2 infection and, if asymptomatic, for transmitting the virus on to fragile cancer patients. We screened 525 health workers of our Cancer Institute with rapid serological test Viva-Diag analyzing COVID-19 associated-IgG/IgM. Six subjects (1,1%) resulted with Viva-Diag test not-negative for IgM. All 6 cases had RT-PCR SARS-CoV-2 test negative; repeating analysis of IgG/IgM expression by CLIA assay also, 2 cases resulted IgM positive and 1 case IgG/IgM positive. This latter subject reported a contact with an infected SARS-CoV-2 person, a month earlier. In conclusion our study seems to suggest: a) a different analytical sensitivity in IgG/IgM evaluation for Viva-Diag and CLIA assays needing to be further determined; b) the ability of Viva-Diag rapid COVID-19 test to evidence health workers positive for Immunoglobulins expression. Discordant results of rapid serological tests with respect to RT-PCR stress the different clinical meaning the two assays can have, question clearly referring to further studies to optimize the utilization of rapid serological test in asymptomatic subjects at high risk for infection.

## Background

Recently, a novel coronavirus was first reported to be responsible for inter-person transmission of lethal pneumonia in China[1]. Subsequently, the cause of that transmissible disease was identified to be a new strain of the coronavirus family named SARS-CoV-2 and the associated disease was called coronavirus disease 2019(COVID-19) (2). COVID-19 rapidly spread all over the world obliging governments to take extraordinary initiatives.

The actions rolled out to try to control the pandemic included establishing strict criteria to define patients from whom oropharyngeal swabs should be collected for molecular diagnosis of COVID-19(3). The RT-PCR test for the identification of viral nucleic acid is the current standard method for diagnosing this disease.

However, despite these actions, worldwide cases of COVID-19 climbed above 1 million and deaths over 50,000 (4). From an analysis of this situation, experts have highlighted several critical issues.

One first consideration concerns the role that asymptomatic infected persons, not routinely submitted to SARS-CoV2 RT-PCR testing, could have in transmitting the disease. Day (5) analyzed the figures from China and suggested that four fifths of infected cases could be asymptomatic and Rothe confirmed that these cases can be a source of infection transmission(6). Another point—which is directly related—regards the need to identify high risk categories that may be exposed to infection so that they may be protected and those that may be asymptomatic potential carriers of virus causing unexpected transmission. Apart from elderly individuals and those with co-morbidities (2), the category at greater risk of COVID-19 infection is obviously represented by healthcare workers(6). Anelli recently reported that in Italy, 20% of health workers could be infected(7).

Moving from the need to identify unknown sources of infection and to adopt better rules for the diagnosis of COVID-19 in persons at high risk of infection, attempts have already been made to identify infected people in nursing facilities (8) and in hospitals (9) by using RT-PCR to test for SARS-CoV-2 positivity.

The RT-PCR test for the identification of viral nucleic acid is the current standard method for diagnosing COVID-19. However, this assay has some practical limitations (3) such as the annoying method to obtain biological material from the nasopharynx, the relatively long time to generate results and the need for certified laboratories and specific expertise.

The Saw Swee Hock School of Public Health of the National University of Singapore recently reviewed(10) the diagnostic tests for COVID-19 infection

currently undergoing clinical validation and also listed immunoassays detecting COVID-19 related IgG and IgM antibodies. This latter experimental attempt, based on previous experiences with epidemic viral SARS infection, argued that specific IgM antibodies against SARS-CoV-2 could be detected in blood after 3-6 days while IgG detection occurred some days later (10). This approach is described as easy to handle and capable of providing results in 15 minutes (10).

Based on the information already reported, we considered the need to screen our healthcare personnel, who are constantly on the front line working with immunodepressed cancer patients, by utilizing an assay that could be applied in a large cohort of asymptomatic subjects. To this purpose, we planned to screen all the health workers in our Cancer Institute for COVID-19 associated immunoglobulins with the rapid serological test, Viva-Diag<sup>TM</sup>. Furthermore, to repeat testing all subjects with Viva-Diag<sup>TM</sup> assay positive for IgG and/or IgM, with standard RT-PCR and other serological tests was also planned.

The aims of the study were a) to verify the ability of the Viva-Diag<sup>TM</sup> kit to identify subjects positive for COVID-19 related immunoglobulins in an asymptomatic cohort of subjects, and b) to gather information on the percentage of health workers at true risk of virus exposure in a non-COVID-19 hospital.

## Material and methods

From March 26 to April 2, all the health workers employed at Istituto Tumori G. Paolo II, IRCCS, of Bari were invited to participate in a prospective trial in which venous blood samples were to be taken from all the participating asymptomatic health workers and then submitted to a rapid serological test, Viva-Diag<sup>TM</sup>. The study was approved by the Ethical Committee of the Istituto Tumori G. Paolo II, IRCCS, Bari with Protocol number CE 872/2020 together with the informed consent form which explained that quantitative serum immunoglobulin tests would be performed on the same blood samples and standard RT-PCR assays carried out on swab samples in cases where suspected infection was flagged up by the Viva-Diag<sup>TM</sup> test.

A total of 525 health workers replied and were enrolled. After signing their written informed consent form, all participants filled in a questionnaire which collected information on their possible risk of COVID-19 infection (contact with confirmed positive individuals or visits to areas with active SARS-CoV-2 circulation). Venous blood samples were then collected and immediately sent to the Clinical Pathology Laboratory (Certified ISO-9001/2015; Head: E. Savino) and to the Institutional Biobank (Certified ISO-9001/2015; Head: A. Paradiso) of the Istituto Tumori G. Paolo II, IRCCS, Bari (I) for Viva-Diag test performance.

The characteristics of the health workers who entered the study are reported in Table 1. Their median age was 48 years (range 20-73 yrs) and 38% were male. A total of 56% of the enrolled workers were involved in direct clinical activities, 6% in laboratory practice, 8% in administrative activities and 30% in maintenance/cleaning activities. 1.4% of them reported minor clinical symptoms not directly referable to COVID-19 disease while 14% reported having had direct contact with individuals with suspected COVID-19 disease in the last two weeks.

### SARS-CoV-2 rapid IgG-IgM Test

SARS-CoV-2 rapid IgG-IgM combined antibody test kit, Viva-Diag<sup>TM</sup>, was designed and manufactured by Jiangsu Medomics Medical Technologies, Nanjing-China. It is a lateral flow qualitative immunoassay for the rapid determination of the presence or absence of both anti- SARS-CoV-2-IgM and anti- SARS-CoV-2-IgG in human specimens (whole blood, serum, and plasma). A surface antigen from SARS-CoV-2 which can specifically bind to SARS-CoV-2 antibodies (including both IgM and IgG) is conjugated to colloidal gold nanoparticles and sprayed onto conjugate pads. The SARS-CoV-2 rapid IgG-IgM combined antibody test strip has two mouse anti-human monoclonal antibodies (anti-IgG and anti-IgM) stripped on two separated test lines. The presence of SARS-CoV-2 IgG and IgM antibodies is indicated by a red/purple line that appears in the specific region for those antibodies on the device. If the specimen did not contain SARS-CoV-2 antibodies, no labeled complexes were bound. Each test was evaluated by two operators and a picture was taken of the result. In case of disagreement between the two operators, the picture was evaluated by a third party.

### Molecular detection of SARS-CoV-2

In cases where COVID-19 was suspected based on the Viva-Diag<sup>TM</sup> test results (n=6), oropharyngeal swabs were collected on the following day for standard SARS-CoV-2 RT-PCR testing. The RT-PCR tests were immediately performed at the Laboratory of Molecular Epidemiology and Public Health (Head: M. Chironna) of the University of Bari (I). The swabs were subjected to nucleic acid extraction by MagNA Pure (Roche Diagnostics, Mannheim, Germany), according to the manufacturer's instructions. The presence of the E gene, RdRP gene and N gene of the SARS-CoV-2 virus were identified by a commercial real-time PCR assay (Allplex 2019-nCoV Assay; Seegene, Seoul, Republic of Korea). Samples were considered positive at molecular screening if all the three genes were detected. The WHO Real-time-PCR protocol was used to confirm the presence of SARS-CoV2

([https://www.who.int/docs/default-source/coronaviruse/usdcrt-pcr-panel-for-detection-instructions.pdf?sfvrsn=3aa07934\\_2](https://www.who.int/docs/default-source/coronaviruse/usdcrt-pcr-panel-for-detection-instructions.pdf?sfvrsn=3aa07934_2)).

### Chemiluminescence (CLIA) IgG/IgM detection

The IgG/IgM dosage was determined utilizing MAGLUMI™ 2019-nCoV IgG (Cat. Ref. 130219015M) and IgM (130219016M) (CLIA) according to the manufacturer's indications (Shenzhen New Industries Biomedical Engineering Co., Ltd; [www.snibe.com](http://www.snibe.com)). Briefly, the kit is designed for indirect chemiluminescence qualitative-semiquantitative in vitro immunoassay of IgG and IgM antibodies against SARS-CoV-2 in human plasma and serum. The pre-diluted biological sample, buffer and magnetic microbeads coated with recombinant SARS-CoV-2 antigen were mixed and incubated to create immunocomplexes. After magnetic field exposure and repeated washing, IgG and IgM antibodies labeled with ABEI were added; the chemiluminescence starter activated the light reaction which was detected by the photomultiplier BIOLUMI™ 8000 ([www.snibe.com](http://www.snibe.com)). Results were expressed as relative light units (RLU). The cut-off value of the test was determined as the mean luminescence value of normal sera plus 5 folds of SD. Results were considered positive if the signal/cutoff (S/C) ratio was  $\geq 1$ .

### **Statistical analyses**

A descriptive analysis of the VivaDiag™ test results with respect to the health workers' characteristics is shown in Table 1. VivaDiag™ test results are compared to the other laboratory assay results in Table 2.

## **RESULTS**

A total of 85% of all the health workers in our National Cancer Research Center, Istituto Tumori G. Paolo II in Bari, Italy were enrolled. Those who did not take part in the study were equally distributed among the various work categories. About 92% of the participants had routine daily contacts with clinical departments.

In 6 out of 525 cases, the VivaDiag™ test (Table 2) provided results that were not negative (weak or strong staining) in the IgM band; in one case, the test described a strong IgG/IgM intensity. Three cases, comprised the latter one, were health workers who reported had had recent contacts with COVID-19 patients. None of them presented clinical symptoms associated with COVID-19 disease. Only one was younger than 55 years of age.

The day after their VivaDiag™ test, oropharyngeal swabs were collected from all 6 subjects for SARS-CoV-2 RT-PCR testing. None of their test results were



positive for the virus (Table 2).

In order to gain further insights into the IgG/IgM analytical sensitivity provided by the colorimetric VivaDiag™ kit, a plasma aliquot (from the same Viva-Diag test blood sample) of all 6 subjects was utilized for CLIA analysis of IgG/IgM. The CLIA results showed IgM positivity in two cases (a nurse and a member of the hospital's cleaning staff, Table 2) and the confirmation of the strong positivity for IgG/IgM in the third one.

## DISCUSSION

Asymptomatic infection with SARS-CoV-2 has been highlighted to be one of the major sources for the spread of COVID-19 and may be the cause for the escalation of cases all over the world. Pioneering efforts in some countries to screen asymptomatic people showed that the problem is not easy to handle. In the small town of Vo' Euganeo (a red zone quarantined area for incident COVID-19 cases in northern Italy), all 3300 inhabitants, including asymptomatic individuals, were tested by standard RT-PCR in the attempt to identify SARS-CoV-2 carriers (11). Six asymptomatic individuals were found to be positive (0.2%). In Iceland, a biotech company working on behalf of the country's Chief Epidemiologist screened the general population. Preliminary results reported that more than 99% of the inhabitants tested had negative results (12). These findings are in contrast with recent figures from China supporting the hypothesis that four fifths of SARS-CoV-2 infected subjects could be asymptomatic (5). In sum, while the true prevalence of asymptomatic infected persons is a matter of debate, it has definitely been accepted that they represent one of the major contributors in the spread of the disease.

Although those studies did not provide information on specific risk categories, health workers category are obviously considered a category at higher risk of infection even when they are involved in general practices or in non-COVID-19 specific hospitals (7). As a consequence, the problem of detecting asymptomatic SARS-CoV-2 infected health workers needs to be considered one of primary relevance. Policies should be enacted to specifically protect healthcare workers and stymie circulation of the virus in the sensitive contexts in which they work.

In order to gain insight into this aspect of the epidemic, we tested 525 asymptomatic workers of our Cancer Institute where immuno-depressed patients are extremely frequent and sporadic COVID-19 positive cases had recently been reported. SARS-CoV-2-associated immunoglobulins were assayed by utilizing a rapid serological colorimetric test.

We believe the results we obtained to be of great interest. The VivaDiag™ test was able to find about 1.1% of cases with suspected presence of COVID-19

specific immunoglobulins. This figure can be considered in line with the percentage of asymptomatic COVID-19 positive cases found in other population-wide experiences. The only two reports regarding healthcare personnel are from The Netherlands (9) and from a nursing-core facilities in Washington, U.S.A. (8). In the Netherlands, Reuskentested 1097 health workers with mild respiratory complaints from nine hospitals and found that 4.1% of them were positive. Kimball analyzed residents of a long-term care skilled nursing facility and reported that 30% of them tested positive. Since those two studies involved subjects and facilities with very different characteristics with respect to those of our Cancer Institute, the present experience can be considered to be the first to address the problem of screening asymptomatic health workers for SARS-CoV-2 infection.

In our study, none of the six workers that tested positive for COVID-19 with the VivaDiag™ kit had oropharyngeal swabs positive for SARS-CoV-2 upon RT-PCR testing. After one week of follow-up, all six operators were still asymptomatic. Our finding that subjects who were positive for COVID-specific IgM/IgG did not present any viral load is in agreement with Lou (13) who reported that higher Ig levels can be asynchronous with respect to viral presence and that can persist long time after virus RT-PCR tests become negative. One more point that drew our attention was the difference between VivaDiag™ and CLIA in detecting the two immunoglobulins. SNIBE ([www.SNIBE.com](http://www.SNIBE.com)) recently announced that its MAGLUMI SARS-CoV-2 IgM/IgG Kits received its CE mark. Considering the cases that tested positive with the VivaDiag™ kit and negative with the CLIA MAGLUMI kit, it would appear that the VivaDiag™ test could have a greater analytical sensitivity. However, our study was not designed to directly compare the performances of the two assays and, then, we cannot exclude conversely a better specificity of CLIA MAGLUMI kit. This because negative cases at VivaDiag™ kit were not tested with the CLIA assay. This aspect will be further investigated in our next trial in which all cases will be double, Viva-Diag and CLIA MAGLUMI kits, tested.

Separate discussion deserves the case strongly positive for IgG/IgM at both serological tests. The subject was a nurse who referred contacts with a COVID-19 patient 30-days before and then it is easy to relate her Ig positivity to that event. It is the first time that a screening with rapid serological test individualize a single asymptomatic health worker with presumed passed virus infection within a cohort of hundreds of subjects.

## CONCLUSIONS

Our study seems to suggest that: a) rapid serological tests can have the ability



to individualize subjects who had a previous contact with SARS-CoV-2 virus; b) a percentage, albeit very small, of our asymptomatic health workers could have been previously exposed to the virus. Further studies are required to confirm and fully interpret our findings and to propose an optimal utilization of serological test in the clinics.

## REFERENCES

1. Zhu N, Zhang D, Wang W, Li X, Yang B, Song J, Zhao X, Huang B, Shi W, Lu R, Niu P, Zhan F, Ma X, Wang D, Xu W, Wu G, Gao GF, Tan W; China Novel Coronavirus Investigating and Research Team. A Novel Coronavirus from Patients with Pneumonia in China, 2019. *N Engl J Med*. 2020 Feb 20;382(8):727-733. doi: 10.1056/NEJMoa2001017. Epub 2020 Jan 24. PubMed PMID: 31978945; PubMed Central PMCID: PMC7092803.
2. Huang C, Wang Y, Li X, Ren L, Zhao J, Hu Y, Zhang L, Fan G, Xu J, Gu X, Cheng Z, Yu T, Xia J, Wei Y, Wu W, Xie X, Yin W, Li H, Liu M, Xiao Y, Gao H, Guo L, Xie J, Wang G, Jiang R, Gao Z, Jin Q, Wang J, Cao B. Clinical features of patients infected with 2019 novel coronavirus in Wuhan, China. *Lancet*. 2020 Feb 15;395(10223):497-506. doi: 10.1016/S0140-6736(20)30183-5. Epub 2020 Jan 24.
3. Jin YH, Cai L, Cheng ZS, Cheng H, Deng T, Fan YP, Fang C, Huang D, Huang LQ, Huang Q, Han Y, Hu B, Hu F, Li BH, Li YR, Liang K, Lin LK, Luo LS, Ma J, Ma LL, Peng ZY, Pan YB, Pan ZY, Ren XQ, Sun HM, Wang Y, Wang YY, Weng H, Wei CJ, Wu DF, Xia J, Xiong Y, Xu HB, Yao XM, Yuan YF, Ye TS, Zhang XC, Zhang YW, Zhang YG, Zhang HM, Zhao Y, Zhao MJ, Zi H, Zeng XT, Wang YY, Wang XH; , for the Zhongnan Hospital of Wuhan University Novel Coronavirus Management and Research Team, Evidence-Based Medicine Chapter of China International Exchange and Promotive Association for Medical and Health Care (CPAM). A rapid advice guideline for the diagnosis and treatment of 2019 novel coronavirus (2019-nCoV) infected pneumonia (standard version). *Mil Med Res*. 2020 Feb 6;7(1):4. doi: 10.1186/s40779-020-0233-6. PubMed PMID: 32029004; PubMed Central PMCID: PMC7003341.
4. [https://www.who.int/docs/default-source/coronaviruse/situation-reports/20200404-sitrep-75-covid-19.pdf?sfvrsn=99251b2b\\_2](https://www.who.int/docs/default-source/coronaviruse/situation-reports/20200404-sitrep-75-covid-19.pdf?sfvrsn=99251b2b_2)
5. M Day, Covid-19: four fifths of cases are asymptomatic, China figures indicate, *BMJ* 2020;369:m1375 doi:10.1136/bmj.m.1375 (published 2 April 2020)
- 6) Rothe C, Schunk M, Sothmann P et al, Transmission of COVID-19 infection from an asymptomatic contact in Germany. *N Engl J Medicine*, 2020; 382, 10. Doi:10.1056/NEJMc2001468
- 7) Sim MR. The COVID-19 pandemic: major risks to healthcare and other workers on the front line. *Occup Environ Med*. 2020 Apr 1. pii: oemed-2020-106567. doi: 10.1136/oemed-2020-106567. [Epub ahead of print] PubMed PMID: 32238444.
- 7) F Anelliet al Italian doctors call for protecting healthcare workers and boosting community surveillance during covid-19 outbreak *BMJ* 2020; 368 doi: <https://doi.org/10.1136/bmj.m1254> (Published 26 March 2020)

8) Kimball A, Hatfield KM, Arons M, James A, Taylor J, Spicer K, Bardossy AC, Oakley LP, Tanwar S, Chisty Z, Bell JM, Methner M, Harney J, Jacobs JR, Carlson CM, McLaughlin HP, Stone N, Clark S, Brostrom-Smith C, Page LC, Kay M, Lewis J, Russell D, Hiatt B, Gant J, Duchin JS, Clark TA, Honein MA, Reddy SC, Jernigan JA; Public Health – Seattle & King County; CDC COVID-19 Investigation Team. Asymptomatic and Presymptomatic SARS-CoV-2 Infections in Residents of a Long-Term Care Skilled Nursing Facility - King County, Washington, March 2020. *MMWR Morb Mortal Wkly Rep.* 2020 Apr 3;69(13):377-381. doi: 10.15585/mmwr.mm6913e1. PubMed PMID: 32240128.

9) Reusken CB, Buiting A, Bleeker-Rovers C, Diederens B, Hooiveld M, Friesema I, Koopmans M, Kortbeek T, Lutgens SP, Meijer A, Murk JL, Overdeest I, Trienekens T, Timen A, Van den Bijllaardt W, Van Dissel J, Van Gageldonk-Lafeber A, Van der Vegt D, Wever PC, Van der Hoek W, Kluytmans J. Rapid assessment of regional SARS-CoV-2 community transmission through a convenience sample of healthcare workers, the Netherlands, March 2020. *Euro Surveill.* 2020 Mar;25(12). doi:10.2807/1560-7917.ES.2020.25.12.2000334. PubMed PMID: 32234115

10 <https://sph.nus.edu.sg/wp-content/uploads/2020/03/COVID-19-Science-Report-Diagnostics-13-Mar.pdf>

11) <https://www.theguardian.com/world/2020/mar/18/scientists-say-mass-tests-in-italian-town-have-halted-covid-19>

12) <https://edition.cnn.com/2020/04/01/europe/iceland-testing-coronavirus-intl/index.html>

13) Bin Lou , Ting-Dong Li , Shu-Fa Zheng, Ying-Ying Su, Zhi-Yong Li, Wei Liu, Fei Yu, Sheng-Xiang Ge, Qian-Da Zou, Quan Yuan, Sha Lin, Cong-Ming Hong, Xiang-Yang Yao, Xue-Jie Zhang , Ding-Hui Wu , Guo-Liang Zhou, Wang-Heng Hou, Ting-Ting Li, Ya-Li Zhang, Shi-Yin Zhang, JianFan , Jun Zhang, Ning-Shao Xia and Yu Chen. Serology characteristics of SARS-CoV-2 infection since the exposure and post symptoms onset <https://doi.org/10.1101/2020.03.23.20041707>

**TABLE 1**  
**CHARACTERISTICS OF THE COHORT OF WORKERS SCREENED FOR COVID-19 DISEASE**  
**BY RAPID SEROLOGICAL TEST VIVA-DIAG™**

| <i><b>COHORT CHARACTERISTICS</b></i>            | <i><b>N=525 (%)</b></i> |
|-------------------------------------------------|-------------------------|
| <i><b>Sex</b></i>                               |                         |
| Male                                            | 199 (37.9%)             |
| Female                                          | 326 (62.1%)             |
| <i><b>Age</b></i>                               | 48years (range: 20-73)  |
| <i><b>Role</b></i>                              |                         |
| Clinical activity                               | 294 (56%)               |
| Laboratory                                      | 34 (6.5%)               |
| Amministrative                                  | 40 (7.6%)               |
| Mainantenance/cleaning                          | 157 (29.9%)             |
| <i><b>Subjects with SARS-CoV-2 contacts</b></i> | 71 (13.5%)              |
| <i><b>Subjects with minor symptoms</b></i>      | 7 (1.4%)                |

**Table 2**  
**CHARACTERISTICS OF SUBJECTS WITH NOT NEGATIVE COVID-19 VIVA-DIAG TEST RESULT AND COMPARISON WITH OTHER ASSAYS**

| ID | Age <sup>1</sup> | Activity     | 2019-nCoV contacts | Minor symptoms | ViVaDiag™ Test Result |                  | SARS-CoV-2 RT-PCR | CLIA ANALYSIS |             |
|----|------------------|--------------|--------------------|----------------|-----------------------|------------------|-------------------|---------------|-------------|
|    |                  |              |                    |                | IgM <sup>2</sup>      | IgG <sup>2</sup> |                   | IgM (AU/mL)   | IgG (AU/mL) |
| #1 | Older            | Not-Clinical | No                 | No             | Weak                  | Neg              | Neg               | 1.715*        | 0.172       |
| #2 | Older            | Clinical     | Yes                | No             | Pos                   | Neg              | Neg               | 1.130*        | 0.132       |
| #3 | Older            | Clinical     | Yes                | No             | Weak                  | Neg              | Neg               | 0.492         | 0.390       |
| #4 | Older            | Not-Clinical | No                 | No             | Weak                  | Neg              | Neg               | 0.569         | 0.150       |
| #5 | Younger          | Not-Clinical | No                 | No             | Weak                  | Neg              | Neg               | 0.826         | 0.283       |
| #6 | Older            | Clinical     | Yes                | No             | Pos                   | Pos              | Neg               | 1.184*        | 6.918*      |

\*cut-off for positivity at CLIA >1 AU/ml;<sup>1</sup>Older and younger indicate an age greater or lower, respectively, than median age of the cohort (48 years); <sup>2</sup>Weak indicate a low-intensity band; Pos: positive result; Neg: negative result.
